# Supplementary material for: A molecular phylogenetic framework for the Ergalataxinae (Neogastropoda: Muricidae)
Source: Oxford University Press journal article supplement (doi:10.1093/mollus/eys028), 2012-11-29
Supplement: eys028supp.docx [file eys028supp.docx]

**SUPPLEMENTARY MATERIAL**

**Table S1.** List of samples sequenced in this study. Not all genes are available for each specimen; unavailable sequences are indicated with dashes. Generic assignments are based on our revised classification; uncertain assignments are indicated by single quotation marks. Type species of valid genera are in bold. Voucher locations: Natural History Museum, London (NHMUK); Australian Museum, Sydney (AM); Western Australian Museum, Perth (WAM); Florida Museum of Natural History, Gainesville (UF); University of Costa Rica (UCR); Universidad Nacional Autónoma de México (CNMO); ‘La Sapienza’ University of Rome (BAU); Muséum Nationale d’Histoire Naturelle, Paris (MNHN). Accession numbers beginning with EU were published by Claremont *et al.* (2008); accession numbers beginning with FN were published by Barco *et al.* (2010); accession numbers beginning with FR were published by Claremont *et al.* (2011).

| **Species** | **Locality** | **Voucher** | **12S** | **28S** | **16S** | **COI** |
| --- | --- | --- | --- | --- | --- | --- |

**Rapaninae (outgroup)**

| ***Concholepas concholepas* (Bruguière, 1789)** | Chile: Isla Rojas, Region XI | NHMUK 19990303 | FN677398 | EU391554 | FN677453 | EU391581 |
| --- | --- | --- | --- | --- | --- | --- |
| ***Dicathais orbita* (Gmelin, 1791)** | Australia: Tasmania | AM C458269 | FN677395 | FN677459 | FN677450 | EU391573 |
| *Mancinella intermedia* (Kiener, 1835) | Mozambique: Cabo Delgado Prov. | NHMUK 20060440 | FN677384 | EU391543 | FN677434 | EU391574 |
| *Rapana bezoar* (Linnaeus, 1767) | Japan: Kochi Pref. | NHMUK 20080038 | FN677376 | FN677476 | FN677438 | FN677421 |
| ***Thais nodosa* (Linnaeus, 1758)** | Ghana: Matrakni Point | NHMUK 20070652 | FN677373 | EU391566 | FN677425 | EU391579 |
| ***Thalessa aculeata* (Deshayes, 1844)** | New Caledonia: Touho | NHMUK 20070631 | FN677374 | FN677477 | FN677426 | FN677422 |

**Ergalataxinae Kuroda & Habe, 1971**

| *Trachypollia lugubris* (C.B. Adams, 1852) | Costa Rica: Puntarenas | UCR 7797 | HE583773 | HE583860 | HE583924 | HE584011 |
| --- | --- | --- | --- | --- | --- | --- |
| *Trachypollia lugubris* (C.B. Adams, 1852) | Panama | BAU 00248 | HE583774 | HE583861 | HE583925 | HE584012 |

**CLADE A**

| *‘Morula’ anaxares* (Kiener, 1836) | Mozambique: Cabo Delgado Prov. | NHMUK 20060450 | HE583775 | EU391541 | HE583926 | EU391584 |
| --- | --- | --- | --- | --- | --- | --- |
| *‘Morula’ anaxares* (Kiener, 1836) | Vanuatu | MNHN IM-2007-18198 | HE583776 | --- | HE583927 | --- |
| *‘Morula’ nodulosa* (Adams, 1845) | Costa Rica: Manzanillo | UCR  7783 | HE583777 | HE583862 | HE583928 | HE584013 |
| *‘Morula’ nodulosa* (Adams, 1845) | Senegal: Almadies | NHMUK 20080030 | HE583778 | --- | HE583929 | --- |
| ***Muricodrupa fenestrata* (Blainville, 1832)** | Mozambique: Cabo Delgado Prov. | NHMUK 20060451 | HE583779 | EU39155 | HE583930 | HE584014 |
| ***Muricodrupa fenestrata* (Blainville, 1832)** | New Caledonia: Noumea | NHMUK 20070620 | HE583780 | FN677474 | FN677428 | FN677419 |

**Subclade U**

| *Tenguella cf. ceylonica* (Dall, 1923) | Malaysia: Langkawi Is | NHMUK 20080822 | HE583781 | HE583863 | HE583931 | HE584015 |
| --- | --- | --- | --- | --- | --- | --- |
| ***Tenguella granulata* (Duclos, 1832)** | Seychelles: Mahé | NHMUK 20070645 | --- | HE583864 | HE583932 | --- |
| ***Tenguella granulata* (Duclos, 1832)** | Mozambique: Cabo Delgado Prov. | NHMUK 20020262 | HE583782 | --- | HE583933 | --- |
| ***Tenguella granulata* (Duclos, 1832)** | New Caledonia: Noumea | NHMUK 20070621 | FN677383 | FN677469 | FN677433 | FN677414 |
| *Tenguella marginalba* (Blainville, 1832) | Australia: Moreton Bay, Queensland | NHMUK 20090088 | HE583783 | HE583865 | HE583934 | HE584016 |
| *Tenguella musiva* (Kiener, 1836) | Malaysia: Langkawi Is | NHMUK 20080744 | FN677380 | FN677472 | FN677430 | FN677417 |
| *Tenguella* n. sp. | Guam: Mangalao | NHMUK 20080772 | FN677379 | FN677473 | FN677429 | FN677418 |
| *Tenguella* n. sp. | Vanuatu: Maloka I. | MNHN IM-2007-18187 | HE583784 | HE583866 | HE583935 | --- |

**CLADE B**

| *‘Morula’ cf fiscella* (Gmelin, 1791) | Japan: Yakushima, Kyushu | NHMUK 20090337 | HE583787 | HE583868 | HE583938 | HE584019 |
| --- | --- | --- | --- | --- | --- | --- |
| *‘Morula’* n. sp. | New Caledonia: Norfolk Ridge | MNHN IM-2009-8827 | HE583785 | --- | HE583936 | HE584017 |
| *‘Morula’* n. sp. | New Caledonia: Norfolk Ridge | MNHN IM-2009-8828 | HE583786 | HE583867 | HE583937 | HE584018 |
| *‘Morula’ rumphiusi* Houart, 1996 | Malaysia: E coast Johor | NHMUK 20080795 | FN677381 | FN677471 | FN677431 | FN677416 |
| *‘Morula’ fiscella* (Gmelin, 1791) | Australia: Queensland | AM C205407 | HE583788 | HE583869 | --- | --- |
| *‘Morula’ fiscella* (Gmelin, 1791) | New Caledonia: Noumea | NHMUK 20070623 | FN677382 | FN677470 | FN677432 | FN677415 |
| *‘Morula’ fiscella* (Gmelin, 1791) | Philippines: Panglao I. | MNHN  IM-2007-18195 | HE583789 | --- | HE583939 | --- |

**Subclade V**

| *Morula aspera* (Lamarck, 1816) | Egypt:  Marsa Alam | no voucher | HE583790 | HE583870 | HE583940 | HE584020 |
| --- | --- | --- | --- | --- | --- | --- |
| *Morula benedicta* (Melvill & Standen, 1895) | Hawaii: French Frigate Shoals | UF 414310 | HE583791 | HE583871 | HE583941 | --- |
| *Morula biconica* (Blainville, 1832) | Philippines: Panglao I. | MNHN  IM-2007-18172 | HE583792 | HE583872 | HE583942 | --- |
| *Morula chrysostoma* (Deshayes, 1844) | United Arab Emirates: Fujairah | NHMUK 20080911 | HE583793 | --- | HE583943 | HE584021 |
| *Morula coronata* (Adams, 1869) | Mozambique: Mozambique Channel | MNHN IM-2009-5447 | HE583794 | HE583873 | HE583944 | HE584022 |
| *Morula japonica* (Sowerby, 1903) | Japan: Sakihara Is, Amami Is | NHMUK 20090347 | HE583795 | HE583874 | HE583945 | HE584023 |
| *Morula nodicostata* (Pease, 1868) | Guam: Mangalao | NHMUK 20080766 | HE583796 | HE583875 | HE583946 | HE584024 |
| *Morula spinosa* (H. & A. Adams, 1853) | Vanuatu: Segond Channel | MNHN IM-2007-18223 | HE583797 | HE583876 | HE583947 | --- |
| *Morula spinosa* (H. & A. Adams, 1853) | Japan: Kagoshima, Kyushiu | NHMUK 20090351 | HE583798 | HE583877 | HE583948 | HE584025 |
| *Morula spinosa* (H. & A. Adams, 1853) | Japan: Miyazaki,  Kyushu | NHMUK 20100148 | HE583799 | HE583878 | HE583949 | HE584026 |
| *Morula striata* (Pease, 1868) | Japan: Sakihara Is, Amami Is | NHMUK 20090346 | HE583800 | HE583879 | HE583950 | HE584027 |
| *Morula striata* (Pease, 1868) | Japan: Yaeyama Is, Okinawa | Y. Kano collection | HE583801 | HE583880 | HE583951 | HE584028 |
| ***Morula uva* (Röding, 1798)** | Guam: Mangalao | NHMUK 20080775 | HE583803 | HE583882 | HE583953 | HE584029 |
| ***Morula uva* (Röding, 1798)** | Guam: Mangalao | NHMUK 20080831 | HE583804 | HE583883 | HE583954 | HE584030 |
| ***Morula uva* (Röding, 1798)** | Guam: Merizo Bay | NHMUK 20080762 | HE583805 | --- | HE583955 | HE584031 |
| ***Morula uva* (Röding, 1798)** | Guam: Merizo Bay | NHMUK 20080780 | HE583806 | --- | HE583956 | HE584032 |
| ***Morula uva* (Röding, 1798)** | Guam: Umatac Bay | NHMUK 20080821 | HE583807 | --- | --- | --- |
| ***Morula uva* (Röding, 1798)** | Japan: Yakushima, Kyushu | NHMUK 20090331 | HE583809 | HE583884 | HE583958 | HE584033 |
| ***Morula uva* (Röding, 1798)** | Mozambique: Cabo Delgado Prov. | NHMUK 20060449 | HE583808 | --- | HE583957 | --- |
| *Morula zebrina* Houart, 2004 | French Polynesia: Moorea | UF 291661 | HE583802 | HE583881 | HE583952 | --- |

**CLADE C**

| *‘Morula’ echinata* (Reeve, 1846) | Vanuatu:  Aoré I. | MNHN  IM-2007-18211 | HE583810 | --- | --- | --- |
| --- | --- | --- | --- | --- | --- | --- |
| *‘Morula’ parva* (Reeve, 1846) | Philippines: Panglao I. | MNHN  IM-2007-18212 | HE583811 | HE583885 | HE583959 | HE584034 |
| ***Phrygiomurex sculptilis* (Reeve, 1844)** | Vanuatu: Palikulo Peninsula | MNHN  IM-2007-18196 | HE583812 | HE583886 | HE583960 | HE584035 |

**Subclade W**

| *‘Orania’ bimucronata* (Reeve, 1846) | Malaysia: Pulau Dayang Bunting | NHMUK 20080746 | HE583813 | HE583887 | HE583961 | HE584036 |
| --- | --- | --- | --- | --- | --- | --- |
| *‘Orania’ gaskelli* (Melvill, 1891) | Vanuatu: Segond Channel | MNHN  IM-2007-18173 | HE583814 | HE583888 | HE583962 | HE584037 |
| *‘Orania’ serotina* (A. Adams, 1853) | Philippines | MNHN  IM-2009-6382 | HE583815 | HE583889 | HE583963 | HE584038 |
| ***Lataxiena fimbriata* (Hinds, 1844)** | Australia: Moreton Bay, Queensland | NHMUK 20090354 | HE583816 | HE583890 | HE583964 | HE584039 |
| ***Usilla avenacea* (Lesson, 1842)** | Hawaii: Oahu | NHMUK 20100385 | HE583817 | HE583891 | HE583965 | HE584040 |
| ***Usilla avenacea* (Lesson, 1842)** | Japan: Konigami, Okinawa | NHMUK 20100318 | HE583818 | HE583892 | HE583966 | HE584041 |

**Subclade X**

| *‘Ergalatax’ contracta* (Reeve, 1846) | Japan: Kamogawa, Chiba Pref. | NHMUK 20080019 | FR854045 | FR853963 | HE583967 | FR853882 |
| --- | --- | --- | --- | --- | --- | --- |
| *‘Ergalatax’ contracta* (Reeve, 1846) | Malaysia: Langkawi Is | NHMUK 20080747 | FN677391 | FN677462 | FN677444 | FN677408 |
| *‘Ergalatax’ junionae* Houart, 2008 | Kuwait: Ras Ajoza | NHMUK 20100394 | FR854046 | FR853964 | HE583968 | FR853883 |
| *‘Ergalatax’ junionae* Houart, 2008 | United Arab Emirates: Abu Dhabi | NHMUK 20080906 | FN677390 | FN677463 | FN677446 | FN677409 |
| ***Cronia amygdala* (Kiener, 1835)** | Australia: Darwin Harbour, NT | NHMUK 20100355 | FR853984 | FR853903 | HE583969 | FR853822 |
| *Cronia aurantiaca* (Hombron & Jacquinot, 1852) | Australia: Queensland | AM C458326 | FR853983 | FR853902 | HE583970 | FR853821 |
| *Drupella margariticola* ‘Oceanic’ | Mozambique: Cabo Delgado Prov. | NHMUK 20060466 | FN677396 | EU391552 | FN677451 | EU391587 |
| *Drupella margariticola* ‘Continental’ | Hong Kong: Bloff I. | NHMUK 20080741.1 | FR853985 | FR853904 | HE583971 | FR853823 |
| ***Drupella cornus* (Röding, 1798)** | New Caledonia: Yaté | NHMUK 20070144 | FR854005 | FR853923 | HE583972 | FR853842 |
| *Drupella eburnea* (Küster, 1862) | Japan: Miyazaki, Kyushu | NHMUK 20100146.2 | FR853991 | FR853909 | --- | FR853828 |
| *Drupella fragum* (Blainville, 1832) | Japan: Fukashima, Oita Pref. | NHMUK 20090098 | FR854009 | FR853927 | HE583973 | FR853846 |
| *Drupella rugosa* (Born, 1778) | Hong Kong: Bloff I. | NHMUK 20080824.1 | FR854011 | FR853929 | HE583974 | FR853848 |
| ***Maculotriton serriale* (Deshayes, 1834)** | Japan: Okinawa Pref. | NHMUK 20080022 | FR854056 | FR853974 | HE583975 | FR853893 |
| ***Maculotriton serriale* (Deshayes, 1834)** | Mozambique: Cabo Delgado Prov. | BAU 00952 | HE583819 | --- | --- | --- |
| ***Maculotriton serriale* (Deshayes, 1834)** | Philippines: Panglao I. | MNHN IM-2007-18197 | FR854057 | FR853975 | HE583976 | FR853894 |

**Subclade Y**

| *‘Spinidrupa’ cf infans* (Smith, 1884) | Mozambique: Mozambique Channel | MNHN IM-2009-5434 | HE583820 | HE583893 | HE583977 | HE584042 |
| --- | --- | --- | --- | --- | --- | --- |
| *‘Spinidrupa’ infans* (Smith, 1884) | Madagascar: Bay of Nazendry | MNHN IM-2009-8833 | HE583821 | HE583894 | HE583978 | HE584043 |
| *‘Spinidrupa’* sp. | Mozambique: Cabo Delgado Prov. | NHMUK 20060429 | HE583833 | EU391542 | HE583987 | EU391586 |
| ***Bedevina birileffi* (Lischke, 1871)** | Japan: Kagoshima, Kyushi | NHMUK 20090344 | HE583822 | HE583895 | HE583979 | HE584044 |
| *Oppomorus funiculata* (Reeve, 1846) | Japan: Amami Is | NHMUK 20090340 | HE583823 | HE583896 | HE583980 | HE584045 |
| *Oppomorus funiculata* (Reeve, 1846) | Japan: Fukashima, Oita Pref. | NHMUK 20090355 | HE583824 | HE583897 | HE583981 | HE584046 |
| *Oppomorus funiculata* (Reeve, 1846) | Japan: Miyake I., Izu Is | NHMUK 20100140 | HE583825 | HE583898 | HE583982 | HE584047 |
| ***Oppomorus nodulifera* (Menke, 1829)** | Australia: Lord Howe I. | AM C433918.1 | HE583826 | --- | --- | --- |
| ***Oppomorus nodulifera* (Menke, 1829)** | Australia: Lord Howe I. | AM C433918.2 | HE583827 | --- | --- | --- |
| ***Oppomorus nodulifera* (Menke, 1829)** | Australia: Sydney, NSW | AM C451257 | HE583828 | HE583899 | HE583983 | HE584048 |
| *Oppomorus purpureocincta* (Preston, 1909) | Japan: Kunigami, Okinawa | UF 351763 | HE583830 | HE583901 | HE583985 | HE584049 |
| *Oppomorus purpureocincta* (Preston, 1909) | Malaysia: Langkawi Is | NHMUK 20080748 | HE583831 | HE583902 | HE583986 | HE584050 |
| *Oppomorus purpureocincta* (Preston, 1909) | Guam: Pago Bay, Mangalao | NHMUK 20080781 | HE583829 | HE583900 | HE583984 | --- |
| ***Spinidrupa euracantha* (A. Adams, 1853)** | Mozambique: Cabo Delgado Prov. | BAU 00951 | HE583832 | --- | --- | --- |

**Subclade Z**

| *‘Cytharomorula’ cf grayi* (Dall, 1889) | New Caledonia: Banc Kaimon Maru | MNHN  IM-2007-18205 | HE583834 | HE583903 | HE583988 | --- |
| --- | --- | --- | --- | --- | --- | --- |
| *‘Cytharomorula’ cf grayi* (Dall, 1889) | New Caledonia: Banc Crypthelia | MNHN  IM-2007-18225 | HE583835 | HE583904 | HE583989 | HE584051 |
| *‘Cytharomorula’ paucimaculata* (Sowerby, 1903) | Philippines: Panglao I. | MNHN  IM-2007-18202 | HE583836 | --- | --- | --- |
| *‘Cytharomorula’ paucimaculata* (Sowerby, 1903) | Philippines: Panglao I. | MNHN  IM-2007-18204 | HE583837 | --- | --- | --- |
| *‘Cytharomorula’ springsteeni* Houart, 1995 | Philippines | MNHN  IM-2007-18184 | HE583838 | HE583905 | HE583990 | HE584052 |
| *‘Orania’ fischeriana* (Tapparone-Canefri, 1882) | Madagascar: Bay of Nazendry | MNHN IM-2009-8832 | HE583839 | HE583906 | HE583991 | HE584053 |
| *‘Orania’ mixta* Houart, 1995 | Philippines: Bohol I. | MNHN  IM-2007-18201 | HE583840 | HE583907 | HE583992 | HE584054 |
| *‘Orania’ mixta* Houart, 1995 | Philippines: Panglao I. | MNHN  IM-2007-18209 | HE583841 | HE583908 | HE583993 | --- |
| *‘Orania’ mixta* Houart, 1995 | Philippines: West Pamilacan I. | MNHN  IM-2007-18708 | HE583842 | HE583909 | HE583994 | --- |
| *‘Orania’ mixta* Houart, 1995 | Solomon Is: Kolombangara I. | MNHN IM-2007-18207 | HE583843 | --- | HE583995 | --- |
| *‘Orania’ ornamentata* Houart, 1995 | Mozambique: Mozambique Channel | MNHN  IM-2009-5587 | HE583844 | HE583910 | HE583996 | HE584055 |
| *‘Orania’ pacifica* (Nakayama, 1988) | Australia: Off Cape Leveque, Western Australia | WAM S32747 | HE583845 | HE583911 | HE583997 | --- |
| *‘Orania’ pacifica* (Nakayama, 1988) | Philippines: Bohol Sea | MNHN  IM-2007-18193 | HE583846 | HE583912 | HE583998 | HE584056 |
| *‘Orania’ rosea* Houart, 1996 | Philippines: Panglao I. | NHMUK 20070583 | HE583847 | HE583913 | HE583999 | --- |
| *‘Pascula’ darrosensis* (E.A. Smith, 1884) | Philippines: Balicasag I. | MNHN  IM-2009-4950 | HE583848 | HE583914 | --- | HE584057 |
| *‘Pascula’ muricata* (Reeve, 1846) | Mozambique: Cabo Delgado Prov. | BAU 00950 | HE583849 | HE583915 | HE584000 | HE584058 |
| *‘Pascula’ muricata* (Reeve, 1846) | Mozambique: Cabo Delgado Prov. | NHMUK 20060435 | HE583850 | EU391549 | HE584001 | --- |
| *‘Pascula’ ochrostoma* (Blainville, 1832) | Japan: Miyake I., Izu Is | NHMUK 20100160 | HE583851 | HE583916 | HE584002 | --- |
| *‘Pascula’ ochrostoma* (Blainville, 1832) | Guam: Merizo Bay | NHMUK 20080757 | HE583852 | HE583917 | HE584003 | --- |
| *‘Pascula’ ochrostoma* (Blainville, 1832) | Philippines: Panglao I. | MNHN IM-2007-18176 | HE583853 | HE583918 | HE584004 | HE584059 |
| *‘Pascula’ ochrostoma* (Blainville, 1832) | French Polynesia: Tahiti | UF 291770 | HE583854 | HE583919 | HE584005 | --- |
| *‘Pascula’ submissa* (E.A. Smith, 1903) | Mozambique: Mozambique Channel | MNHN  IM-2009-5440 | HE583855 | HE583920 | HE584006 | HE584060 |
| *‘Pascula’ submissa* (E.A. Smith, 1903) | Mozambique: Mozambique Channel | MNHN  IM-2009-5609 | HE583856 | HE583921 | HE584007 | --- |
| *‘Thais’ castanea* (Küster, 1886) | Sunrise-on-Sea: South Africa | NHMUK  20100166 | HE583857 | HE583922 | HE584008 | HE584061 |
| ***Cytharomorula vexillum* Kuroda, 1953** | New Caledonia: Banc Capel | MNHN  IM-2007-18174 | HE583858 | HE583923 | HE584009 | HE584062 |
| ***Cytharomorula vexillum* Kuroda, 1953** | New Caledonia: Banc Nova Sud | MNHN  IM-2007-18203 | HE583859 | --- | HE584010 | --- |

**Table S2.** Comments on genera sometimes included in the Ergalataxinae, but not analysed herein. The placement of the type species of all genera in this table should be tested with molecular data (except where noted).

| **Genus** | **Type species** | **First included in Ergalataxinae by** | **Comment** |
| --- | --- | --- | --- |
| *Azumamorula* Emerson, 1968 (new name for *Morulina* Dall, 1923) | *Ricinula mutica* Lamarck, 1816 | Houart, 2004 | Often used as subgenus of *Morula* (e.g. Houart, 2004); possible synonym of *Tenguella* |
| *Cinclidotyphis* DuShane, 1969 | *Cinclidotyphis myrae* DuShane, 1969 | Vokes, 1996 | Tryptotyphinae (R. Houart, unpublished) |
| *Cumella* Jousseaume, 1898 | *Cumella cumella* Jousseaume, 1898 | Vokes, 1996 | Unavailable: junior homonym of *Cumella* Sars, 1865 (Crustacea). Valid name *Lataxiena* Jousseaume, 1883 (R. Houart, unpublished) |
| *Daphnellopsis* Schepman, 1913 | *Daphnellopsis lamellosa* Schepman, 1913 | Houart, 1995 | Placement in Ergalataxinae uncertain (R. Houart, unpublished) |
| *Galfridus* Iredale, 1924 | *Triton (Cumia) speciosum* Angas, 1871 | Vokes, 1996 | Subgenus of *Phyllocoma* (Ponder, 1972; see below) |
| *Lindapterys* Petuch, 1987 | *Lindapterys vokesae* Petuch, 1987 | Houart, 1995 | Placement in Ergalataxinae uncertain (R. Houart, unpublished) |
| *Minibraria* Sarasua, 1984 | *Colubraria monroei* McGinty, 1962 | <http://www.malacolog.org> | Related to *Phyllocoma* (Beu & Maxwell, 1987; see below); resembles *Colubraria* (R. Houart, unpublished) |
| *Phyllocoma* Tapparone Canefri, 1881 | *Triton convolutus* Broderip, 1833 | Tröndlé & Houart, 1992 | Muricinae (R. Houart, unpublished; preliminary molecular data, M. Claremont, unpublished) |
| *Uttleya* Marwick, 1934 | *Uttleya arcana* Marwick, 1934 | Vokes, 1996 | Placement in Ergalataxinae uncertain (R. Houart, unpublished) |
| *Xanthochorus* P. Fischer, 1884 | *Purpura cassidiformis* Blainville, 1832 | Vokes, 1996 | Ocenebrinae (confirmed with molecular data by Barco *et al.*, 2010) |

SUPPLEMENTARY MATERIAL: REFERENCES

BARCO, A., CLAREMONT, M., REID, D.G., HOUART, R., BOUCHET, P., WILLIAMS, S.T., CRUAUD, C., COULOUX, A. & OLIVERIO, M. 2010. A molecular phylogenetic framework for the Muricidae, a diverse family of carnivorous gastropods. *Molecular Phylogenetics and Evolution,* **56:** 1025-1039.

BEU, A.G. & MAXWELL, P.A. 1987. A revision of the fossil and living gastropods related to *Plesiotriton* Fischer, 1884 (Family Cancellariidae, Subfamily Plesiotritoninae n. subfam.). *New Zealand Geological Survey Paleontological Bulletin,* **54:** 1­1–140.

CLAREMONT, M., REID, D.G. & WILLIAMS, S.T. 2008. A molecular phylogeny of the Rapaninae and Ergalataxinae (Neogastropoda: Muricidae). *Journal of Molluscan Studies,* **74:** 215-221.

CLAREMONT, M., REID, D.G. & WILLIAMS, S.T. 2011. Evolution of corallivory in the gastropod genus *Drupella*. *Coral Reefs* **30**: 977-990.

HOUART, R. 1995. The Ergalataxinae (Gastropoda, Muricidae) from the New Caledonia region with some comments on the subfamily and the description of thirteen new species from the Indo-West Pacific. *Bulletin du Muséum National d’Histoire Naturelle. Section A,* **16:** 245-297.

HOUART, R. 2004. Review of the Recent species of *Morula (Oppomorus), M. (Azumamorula) and M. (Habromorula)* (Gastropoda: Muricidae: Ergalataxinae). *Novapex,* **5:** 91-130.

PONDER, W.F. 1972. Notes on some Australian genera and species of the family Muricidae (Neogastropoda). *Journal of the Malacological Society of Australia,* **2:** 215-248.

TRÖNDLÉ, J. & HOUART, R. 1992. Les Muricidae de Polynésie française. *Apex,* **7:** 67-149.

VOKES, E.H. 1996. One last look at the Muricidae. *American Conchologist,* **24:** 4-6.
